# Supplementary material for: Americans’ occupational status reflects the status of both of their parents
Source: PubMed Central journal article supplement — Proc Natl Acad Sci U S A. 2018 Sep 4;115(38):9527–32. doi: 10.1073/pnas.1802508115 (PMC6156671; doi:10.1073/pnas.1802508115), 2018-09-04
Supplement: pnas.1802508115.sapp.pdf [file pnas.1802508115.sapp.pdf]

# Occupational Changes in a Generation in the United States, 1994-2016: Medians Show Strong Persistence from Origins to Destinations

## Supplementary Information

Supplementary information for this paper includes descriptive statistics, comparison figures from classic studies (Blau and Duncan, 1967; Featherman and Hauser 1978) that show that median regression estimates are higher in those data as well as in the GSS data, comparison figures that repeat Figs. 2-5 of the main paper replacing SEI with Hauser-Warren credential scores, and density plots to complement Fig. 5 in the main paper.

Table S1. Means and Medians for Current and Parents' SEI by Gender, Parents' Employment Status, and Occupation: Persons 25-69 Years Old, Living in the United States Currently and at the Time They Were in High School, 1994-2016

| <i>Parents' status</i> | <i>Occupation</i> | <i>Men</i> |        |       | <i>Women</i> |        |       |
|------------------------|-------------------|------------|--------|-------|--------------|--------|-------|
|                        |                   | Mean       | Median | Count | Mean         | Median | Count |
| Father not missing     | Current           | 49.0       | 45.4   | 8,196 | 47.5         | 41     | 9,462 |
|                        | Father            | 46.8       | 41.0   |       | 45.8         | 39.9   |       |
| Mother not missing     | Current           | 48.2       | 45.0   | 6,574 | 46.7         | 39.7   | 8,024 |
|                        | Mother            | 38.8       | 35.8   |       | 38.0         | 35.5   |       |
| Two-earners            | Current           | 49.3       | 46.0   | 5,218 | 48.1         | 41.1   | 6,182 |
|                        | Combined          | 44.1       | 41.2   |       | 43.0         | 40.0   |       |
| Father-only            | Current           | 48.6       | 45.1   | 2,978 | 46.3         | 39.7   | 3,280 |
|                        | Father            | 46.1       | 39.9   |       | 45.6         | 39.9   |       |
| Mother-only            | Current           | 44.0       | 38.8   | 1,356 | 42.0         | 38.3   | 1,842 |
|                        | Mother            | 36.1       | 31.9   |       | 35.7         | 27.0   |       |

Source: Author's calculations from General Social Surveys, 1994-2016.

Table S2. Percentage of Men Working in the Same Occupation as Their Father by Father's Occupation (Outflow) and the Son's Current Occupation (Inflow): Men 25-69 Years Old, Living in the United States Currently and at the Time They Were in High School, 1994-2016

| <i>Occupation</i>                                 | <i>Same</i> | <i>Score</i> | <i>Count</i> |
|---------------------------------------------------|-------------|--------------|--------------|
| <u>Father's occupation (outflow)</u>              |             |              |              |
| Pipelayers, plumbers, pipefitters, & steamfitters | 19.8        | 36           | 79           |
| Dentists                                          | 16.0        | 92           | 20           |
| Physicians & surgeons                             | 15.0        | 93           | 68           |
| Lawyers                                           | 14.0        | 91           | 71           |
| Truck drivers & driver-sales workers              | 14.0        | 32           | 360          |
| Police & sheriff's patrol officers                | 12.4        | 65           | 86           |
| Carpenters                                        | 11.7        | 29           | 158          |
| Grounds maintenance workers                       | 11.0        | 19           | 53           |
| Construction managers                             | 10.8        | 68           | 120          |
| Brickmasons, blockmasons, & stonemasons           | 10.6        | 25           | 40           |
| Electricians                                      | 10.6        | 45           | 82           |
| <u>Son's current occupation (inflow)</u>          |             |              |              |
| Farmers, ranchers, & agricultural managers        | 68.0        | 40           | 70           |
| Physicians & surgeons                             | 24.0        | 93           | 45           |
| Brickmasons, blockmasons, & stonemasons           | 19.9        | 25           | 26           |
| Pipelayers, plumbers, pipefitters, & steamfitters | 16.5        | 36           | 92           |
| Logging workers                                   | 16.0        | 20           | 21           |
| Clergy                                            | 15.7        | 63           | 37           |
| Police & sheriff's patrol officers                | 14.6        | 65           | 75           |
| Miscellaneous agricultural workers                | 14.2        | 14           | 50           |
| Truck drivers & driver-sales workers              | 13.2        | 32           | 361          |
| Carpenters                                        | 12.9        | 29           | 147          |

Source: Author's calculations from General Social Surveys, 1994-2016.

Table S3. Larger Mostly Female Occupations: Credential Rank, Percent Women, and Sample Size, Persons 25-69 Years Old, Living in the United States Currently and at the Time They Were in High School, 1994-2016

| <i>Occupation</i>                                         | <i>Women<br/>%</i> | <i>SEI<br/>score</i> | <i>Count</i> |
|-----------------------------------------------------------|--------------------|----------------------|--------------|
| Registered nurses                                         | 92                 | 84                   | 360          |
| Elementary and middle school teachers                     | 88                 | 81                   | 475          |
| Special education teachers                                | 78                 | 72                   | 71           |
| Medical and health services managers                      | 77                 | 72                   | 92           |
| Diagnostic related technologists and technicians          | 76                 | 69                   | 52           |
| Business operations specialists, all other                | 81                 | 64                   | 56           |
| Social workers                                            | 82                 | 63                   | 163          |
| Paralegals and legal assistants                           | 86                 | 60                   | 64           |
| Licensed practical and licensed vocational nurses         | 98                 | 47                   | 101          |
| Preschool and kindergarten teachers                       | 100                | 41                   | 106          |
| Secretaries and administrative assistants                 | 94                 | 39                   | 742          |
| Insurance claims and policy processing clerks             | 86                 | 39                   | 51           |
| Customer service representatives                          | 75                 | 38                   | 293          |
| Bookkeeping, accounting, and auditing clerks              | 94                 | 38                   | 243          |
| Health practitioner support technologists and technicians | 88                 | 37                   | 83           |
| Office clerks, general                                    | 89                 | 36                   | 170          |
| Billing and posting clerks                                | 95                 | 33                   | 78           |
| Data entry keyers                                         | 88                 | 33                   | 70           |
| Medical assistants                                        | 93                 | 29                   | 57           |
| Teacher assistants                                        | 92                 | 26                   | 150          |
| Receptionists and information clerks                      | 96                 | 26                   | 141          |
| Hairdressers, hairstylists, and cosmetologists            | 90                 | 25                   | 143          |
| Nursing, psychiatric, and home health aides               | 92                 | 24                   | 512          |
| Electrical, electronics, and electromechanical assemblers | 75                 | 23                   | 53           |
| Cashiers                                                  | 93                 | 22                   | 306          |
| Childcare workers                                         | 97                 | 22                   | 238          |
| Tellers                                                   | 94                 | 21                   | 65           |
| Personal care aides                                       | 89                 | 20                   | 99           |
| Waiters and waitresses                                    | 87                 | 20                   | 259          |
| Combined food preparation and serving workers             | 82                 | 14                   | 70           |
| Food preparation workers                                  | 80                 | 14                   | 62           |
| Sewing machine operators                                  | 91                 | 13                   | 64           |
| Maids and housekeeping cleaners                           | 95                 | 13                   | 238          |

Note: The criteria for being included in this list were occupations that were at least 75 percent women and a count of at least 50 cases.

Source: Author's calculations from General Social Surveys, 1994-2016.

Table S4. Coefficients for Regression of Current Occupation on Parent's Occupation by Estimator, Gender, Parents' Employment, Parent, and Measure: Persons 25-69 Years Old, Living in the United States Currently and at the Time They Were in High School, 1994-2016

| Parents' employment          | Parent   | OLS              |                  | Median           |                  |
|------------------------------|----------|------------------|------------------|------------------|------------------|
|                              |          | Men              | Women            | Men              | Women            |
| A. Socioeconomic index (SEI) |          |                  |                  |                  |                  |
| Father not missing           | Father   | 0.312<br>(0.014) | 0.285<br>(0.013) | 0.492<br>(0.020) | 0.396<br>(0.018) |
| Mother not missing           | Mother   | 0.214<br>(0.014) | 0.252<br>(0.014) | 0.356<br>(0.023) | 0.356<br>(0.020) |
| Two-earner                   | Combined | 0.369<br>(0.019) | 0.370<br>(0.020) | 0.569<br>(0.029) | 0.530<br>(0.029) |
| Father-only                  | Father   | 0.357<br>(0.028) | 0.315<br>(0.024) | 0.529<br>(0.034) | 0.409<br>(0.029) |
| Mother-only                  | Mother   | 0.175<br>(0.032) | 0.275<br>(0.031) | 0.265<br>(0.048) | 0.384<br>(0.039) |
| B. Credential score          |          |                  |                  |                  |                  |
| Father not missing           | Father   | 0.332<br>(0.015) | 0.272<br>(0.013) | 0.443<br>(0.018) | 0.256<br>(0.013) |
| Mother not missing           | Mother   | 0.245<br>(0.015) | 0.251<br>(0.013) | 0.331<br>(0.014) | 0.224<br>(0.012) |
| Two-earner                   | Combined | 0.396<br>(0.020) | 0.356<br>(0.019) | 0.522<br>(0.024) | 0.353<br>(0.018) |
| Father-only                  | Father   | 0.378<br>(0.028) | 0.307<br>(0.024) | 0.507<br>(0.028) | 0.254<br>(0.023) |
| Mother-only                  | Mother   | 0.178<br>(0.033) | 0.245<br>(0.029) | 0.272<br>(0.038) | 0.232<br>(0.020) |

Notes: Father's and mother's occupational scores were combined by weighting father's score by 0.6 and mother's score by 0.4, and adding the weighted scores. Models include dummy variables for farm origin and year.

Source: Author's calculations from General Social Surveys, 1994-2016.

Table S5. Coefficients for Regression of Current SEI on Father's SEI and Farm Origin, Using 1970 Occupational Classification and 1970 SEI Scores, by Gender and Time Period: Persons, 25-69 Years Old, 1972-1990

| <i>Variable</i>        | <i>Time Period</i> |                   |                   |                   |
|------------------------|--------------------|-------------------|-------------------|-------------------|
|                        | 1972-<br>1975      | 1976-<br>1980     | 1982-<br>1985     | 1986-<br>1990     |
| <b>A. Men</b>          |                    |                   |                   |                   |
| Father's SEI           | 0.526<br>(0.043)   | 0.599<br>(0.052)  | 0.477<br>(0.061)  | 0.533<br>(0.049)  |
| Farm origin            | -4.750<br>(0.720)  | -3.521<br>(0.744) | -4.787<br>(0.780) | -6.416<br>(1.041) |
| Constant               | 16.025<br>(1.391)  | 13.058<br>(1.613) | 17.237<br>(1.819) | 17.530<br>(1.784) |
| R <sup>2</sup>         | 0.118              | 0.113             | 0.088             | 0.098             |
| <i>Number of cases</i> | 1,772              | 1,664             | 1,718             | 2,046             |
| <b>A. Women</b>        |                    |                   |                   |                   |
| Father's SEI           | 0.345<br>(0.040)   | 0.355<br>(0.042)  | 0.326<br>(0.032)  | 0.359<br>(0.033)  |
| Farm origin            | -4.748<br>(0.878)  | -5.316<br>(1.031) | -6.467<br>(1.424) | -3.587<br>(1.459) |
| Constant               | 17.478<br>(1.109)  | 18.326<br>(1.275) | 22.099<br>(1.074) | 21.693<br>(1.074) |
| R <sup>2</sup>         | 0.073              | 0.066             | 0.050             | 0.054             |
| <i>Number of cases</i> | 1,776              | 1,828             | 2,091             | 2,451             |

Source: Author's calculations from General Social Surveys, 1972-1990.

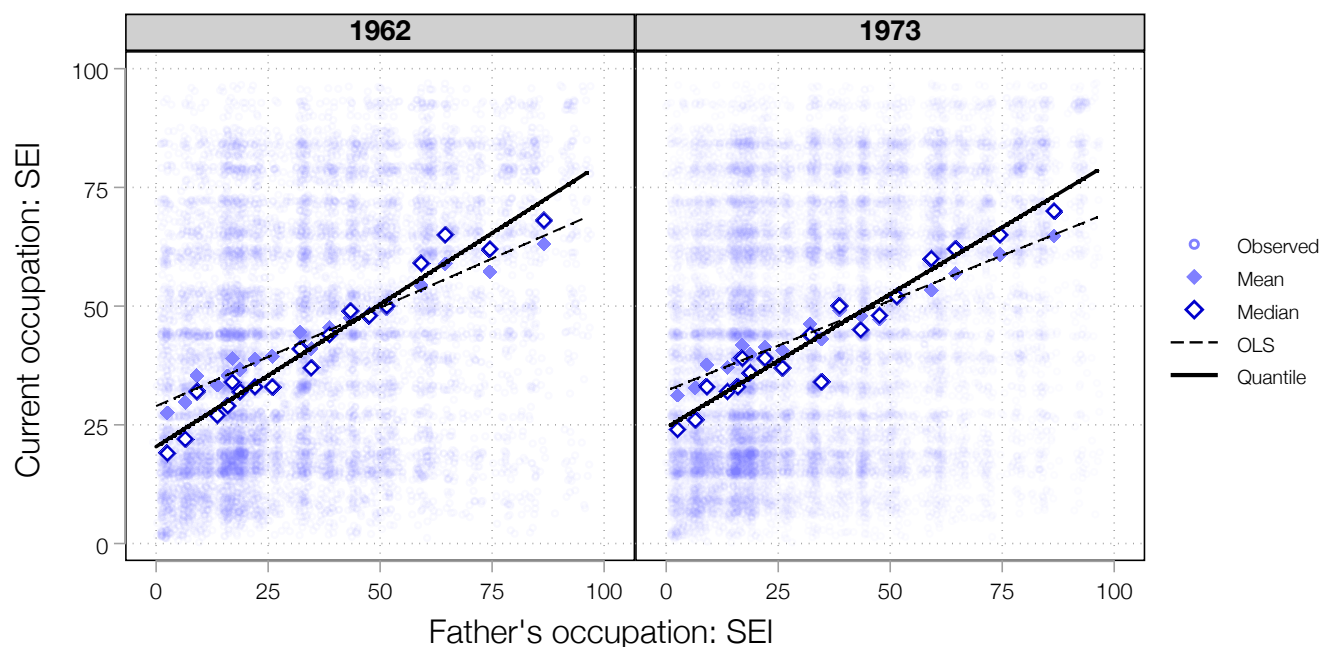

Figure S1. Current SEI by father's SEI by year: Men, 25-64 years old, experienced civilian labor force, nonfarm origins, 1962 and 1973

Note: Occupations were coded according to the U.S. Census Bureau's 1960 protocol; socioeconomic scores (SEI) were assigned according to procedures described by Featherman and Hauser (1978). Observed data were jittered slightly to reveal overlapping observations; 1962 data are 5% transparent and 1973 data are 4% transparent so areas with more cases appear darker. Means and medians for current occupations were calculated for 19 roughly equal-sized bins.

Source: Author's calculations from the Occupational Changes in a Generation Surveys (OCG-I and OCG-II), Supplements to the March 1962 and March 1973 Current Population Surveys.

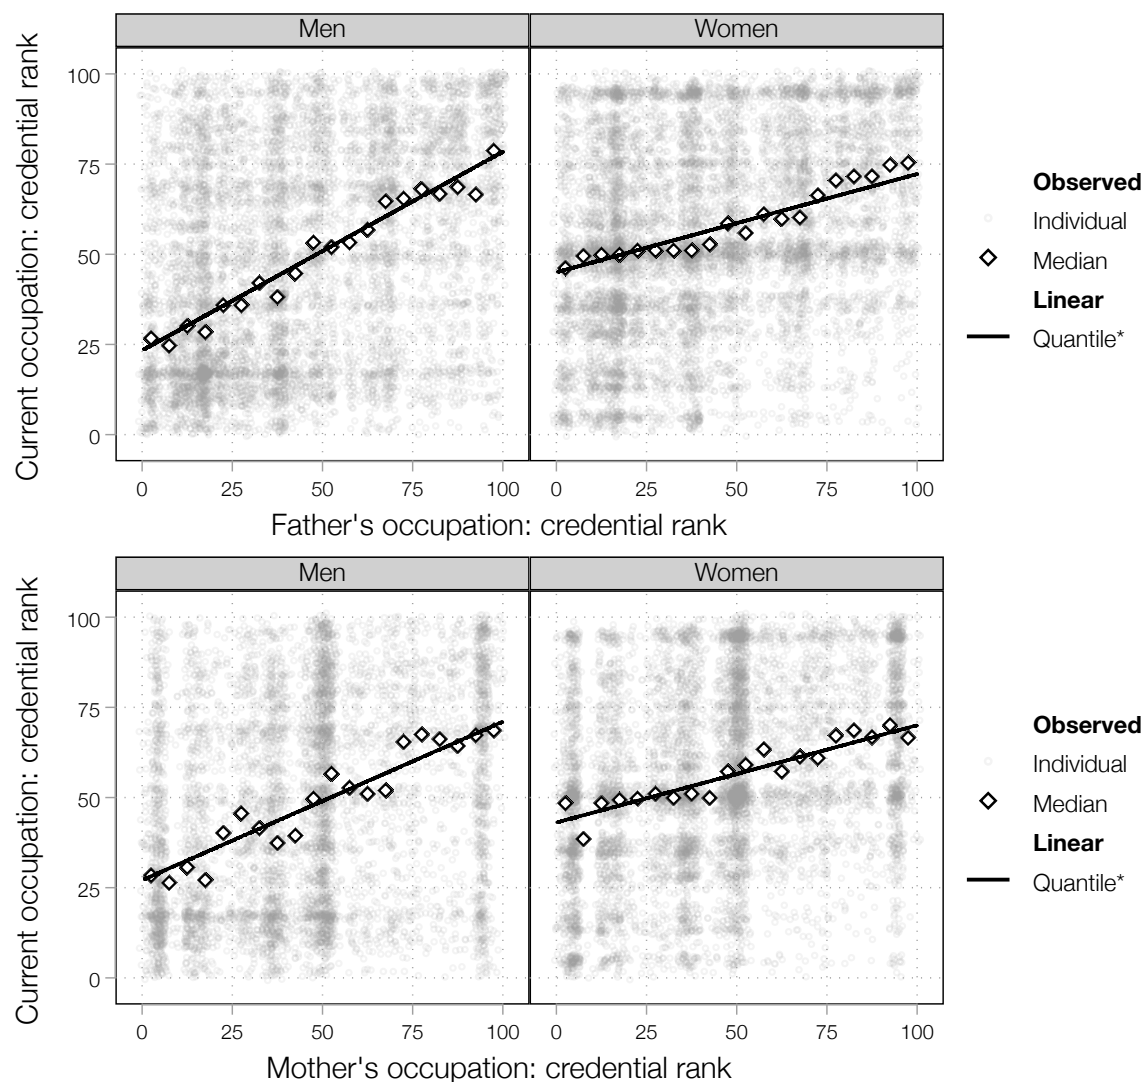

Figure S2. Current credential score by father's or mother's credential score by gender: Persons, 25-69 years old, living in the United States at the time they were in high school and currently, 1994-2016

Note: Observed data jittered slightly to reveal overlapping observations. Regressions included a dummy variable for farm origins; that variable was set to zero (nonfarm origins) in drawing the lines. This figure supplements Figs. 1 and 2 in the main part of the paper by using an alternative scale of occupational status.

Source: Author's calculations from the General Social Surveys, 1994-2016.

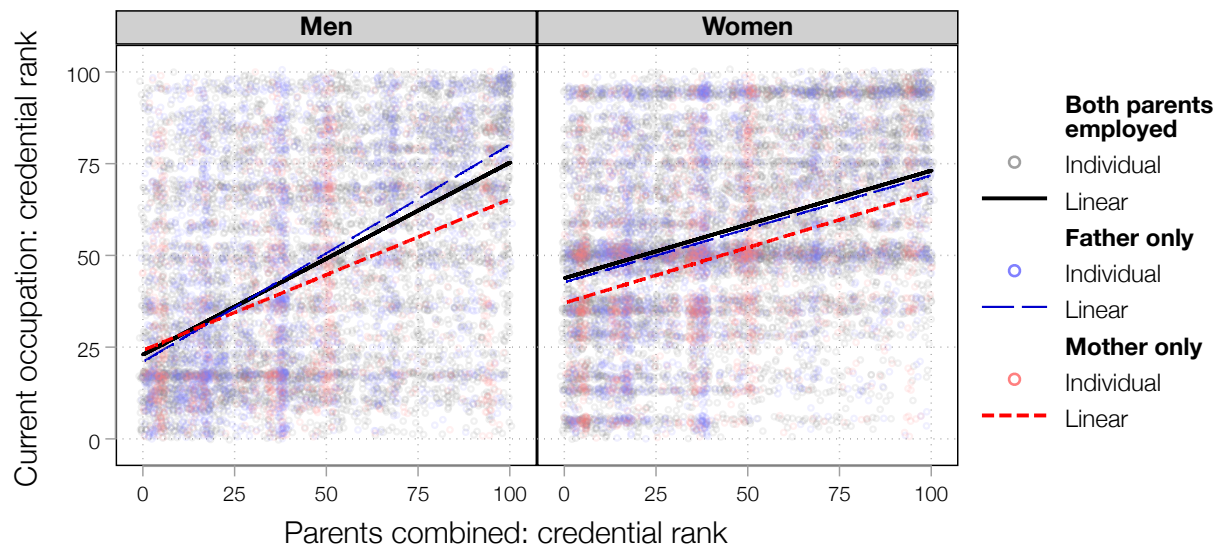

Figure S3. Current credential score by father's and mother's combined credential score by gender and parents' employment status: Persons, 25-69 years old, living in the United States at the time they were in high school and currently, 1994-2016

Note: Observed data jittered slightly to reveal overlapping observations. Regressions included a dummy variable for farm origins; that variable was set to zero (nonfarm origins) in drawing the lines. This figure supplements Fig. 3 in the main part of the paper by using an alternative scale of occupational status.

Source: Author's calculations from the General Social Surveys, 1994-2016.

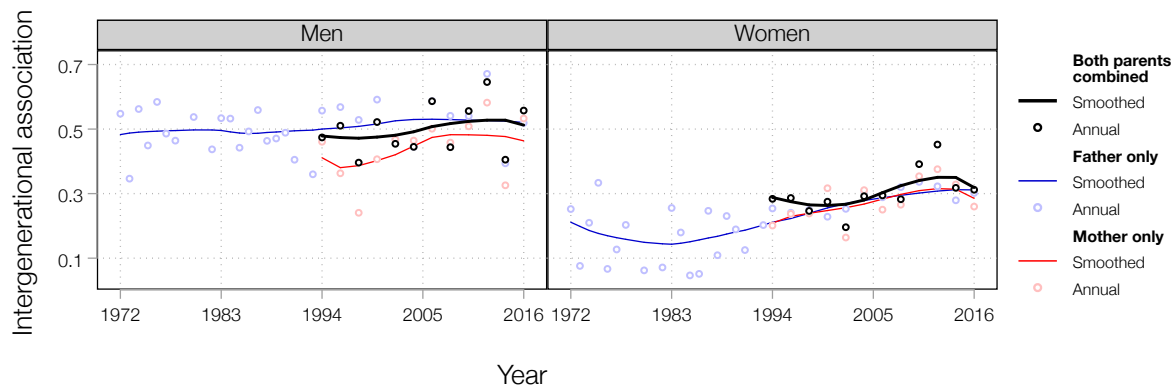

Figure S4. Association between the socioeconomic rank of current occupation and parents', father's, or mother's occupation by year and gender: Persons, 25-69 years old, living in the United States at the time they were in high school and currently, 1972-2016

Note: Annual estimates smoothed by locally estimated regressions (lowess). Mother's occupation was not asked before 1994 so the combined and mother's time series start in 1994. The father's occupation series was smoothed with a bandwidth set to 0.7; bandwidths for the shorter mother's and combined series were set to 0.99.

Source: Author's calculations from the General Social Surveys, 1972-2016.

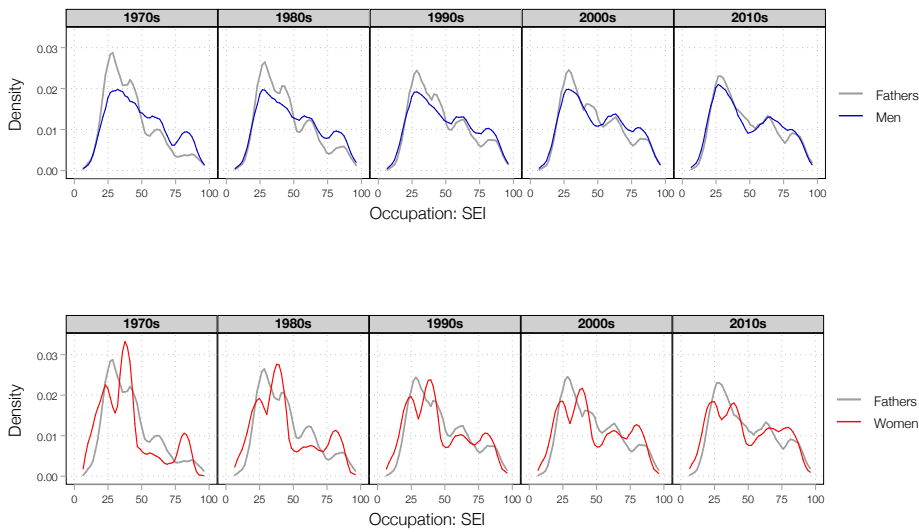

Figure S5. Comparison of current SEI distribution and father's SEI distribution by gender and decade: Persons with nonfarm origins, 25-69 years old, living in the United States at the time they were in high school and currently, 1972-2016

Source: Author's calculations from the General Social Surveys, 1994-2016.
